# Supplementary material for: Effect of Lipid Composition onIn VitroRelease and Skin Deposition of Curcumin Encapsulated Liposomes
Source: Hindawi journal article supplement (doi:10.1155/2016/4535790), 2016-01-01
Supplement: f1 [file 4535790.f1.docx]

**Supplementary material**

The Z-average size was taken as the average size.

FIGURE S1: The particle size distribution by intensity of curcumin encapsulated negatively charged liposomes.

FIGURE S2: The particle size distribution by intensity of curcumin encapsulated negatively charged hybrid liposomes.

FIGURE S3: The particle size distribution by intensity of curcumin encapsulated positively charged liposomes.

FIGURE S4: The size distribution by intensity of curcumin encapsulated positively charged hybrid liposomes.

Zeta-potential distributions are given below.

FIGURE S5: The zeta-potential distribution of curcumin encapsulated negatively charged liposomes.

FIGURE S6: The zeta-potential distribution of curcumin encapsulated negatively charged hybrid liposomes.

FIGURE S7: The zeta-potential distribution of curcumin encapsulated positively charged liposomes.

FIGURE S8: The zeta-potential distribution of curcumin encapsulated positively charged hybrid liposomes.

DSC curves are given below.

FIGURE S9: DSC heating curves of four types of curcumin encapsulated liposomes; A - negatively charged liposomes, B - negatively charged hybrid liposomes, C - positively charged liposomes, D - positively charged hybrid liposomes.

FIGURE S10: DSC cooling curves of four types of curcumin encapsulated liposomes; A - negatively charged liposomes, B - negatively charged hybrid liposomes, C - positively charged liposomes, D - positively charged hybrid liposomes.

HPLC analysis of curcumin was carried out taking into account the area under the curve (AUC) of the curcumin peak which appeared at 11.5 min observed at 435 min. HPLC chromatogram of curcumin is given below.


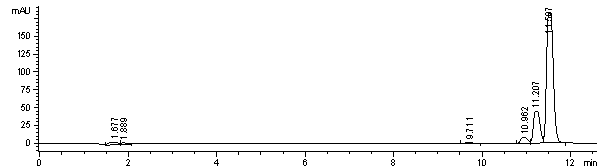


FIGURE S11: The HPLC chromatogram of curcumin.

The standard curve is given below:

FIGURE S12: The standard curve of AUC vs concentration of curcumin (AUC - area under the curve of HPLC peak corresponding to curcumin).
